# Supplementary material
Source: publisher figshare collection journal article supplement (https://acs.figshare.com/ndownloader/files/4540540)
Supplement: Supplementary file 1 [file 4540540]

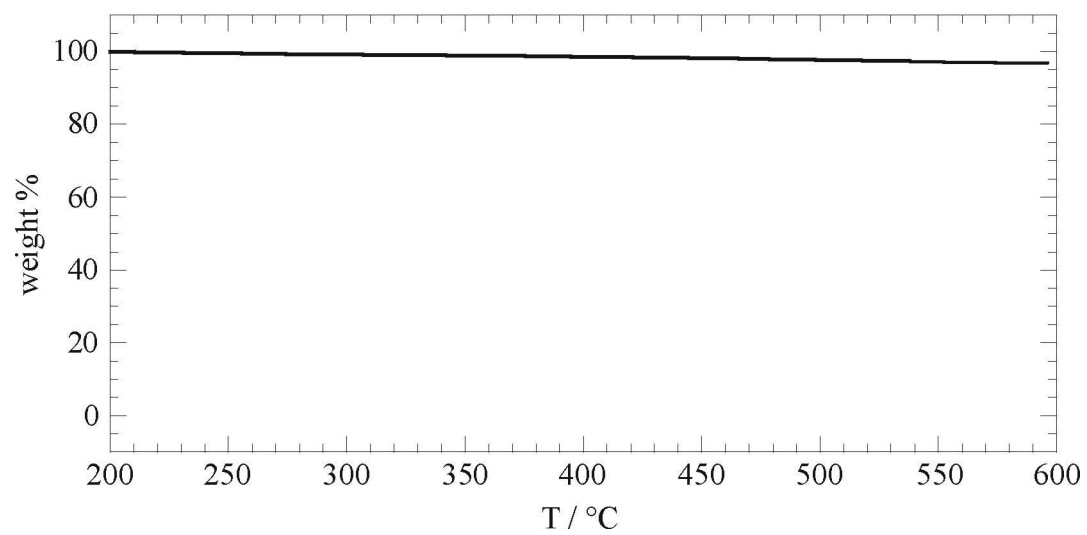

**Figure 1S.** TGA thermogram for laponite RD at the heating rate of  $10\text{ }^{\circ}\text{C min}^{-1}$ .

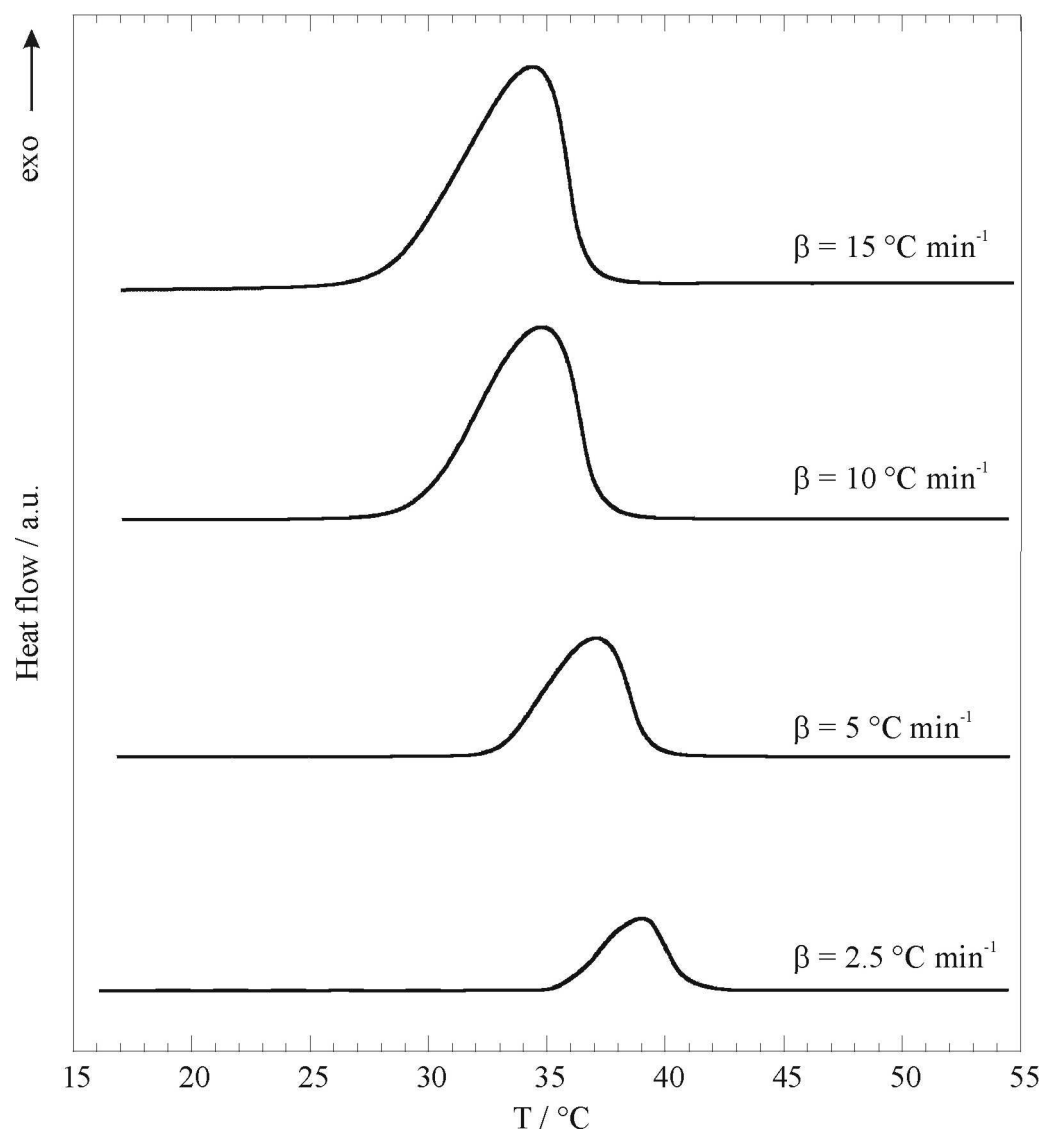

**Figure 2S.** DSC curves of pure F127 at various cooling rates.

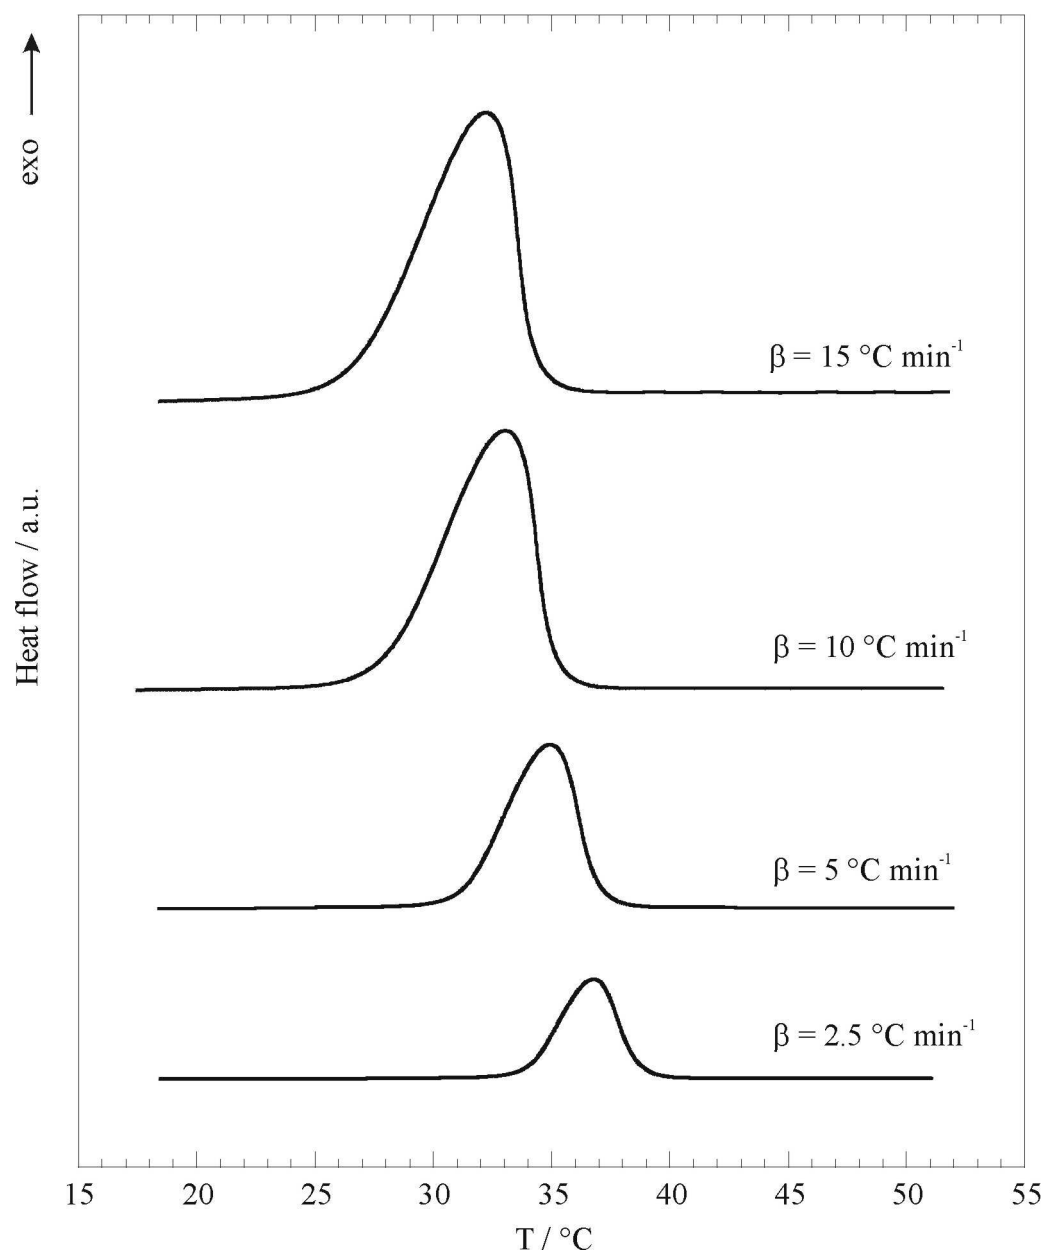

**Figure 3S.** DSC curves of F127/laponite RD at the cac at various cooling rates.

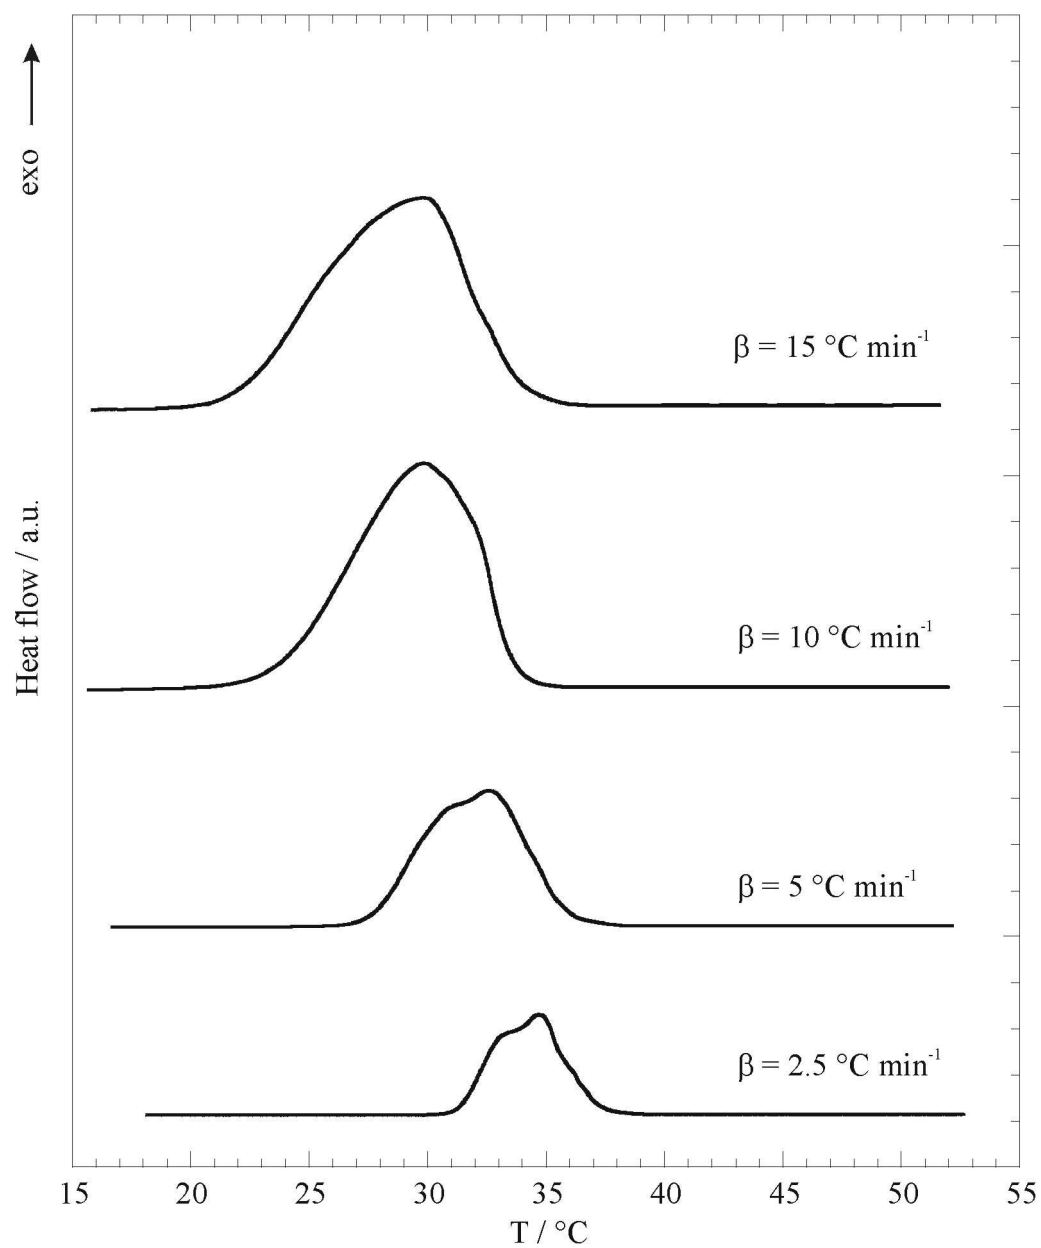

**Figure 4S.** DSC curves of pure PEG 2000 at various cooling rates.

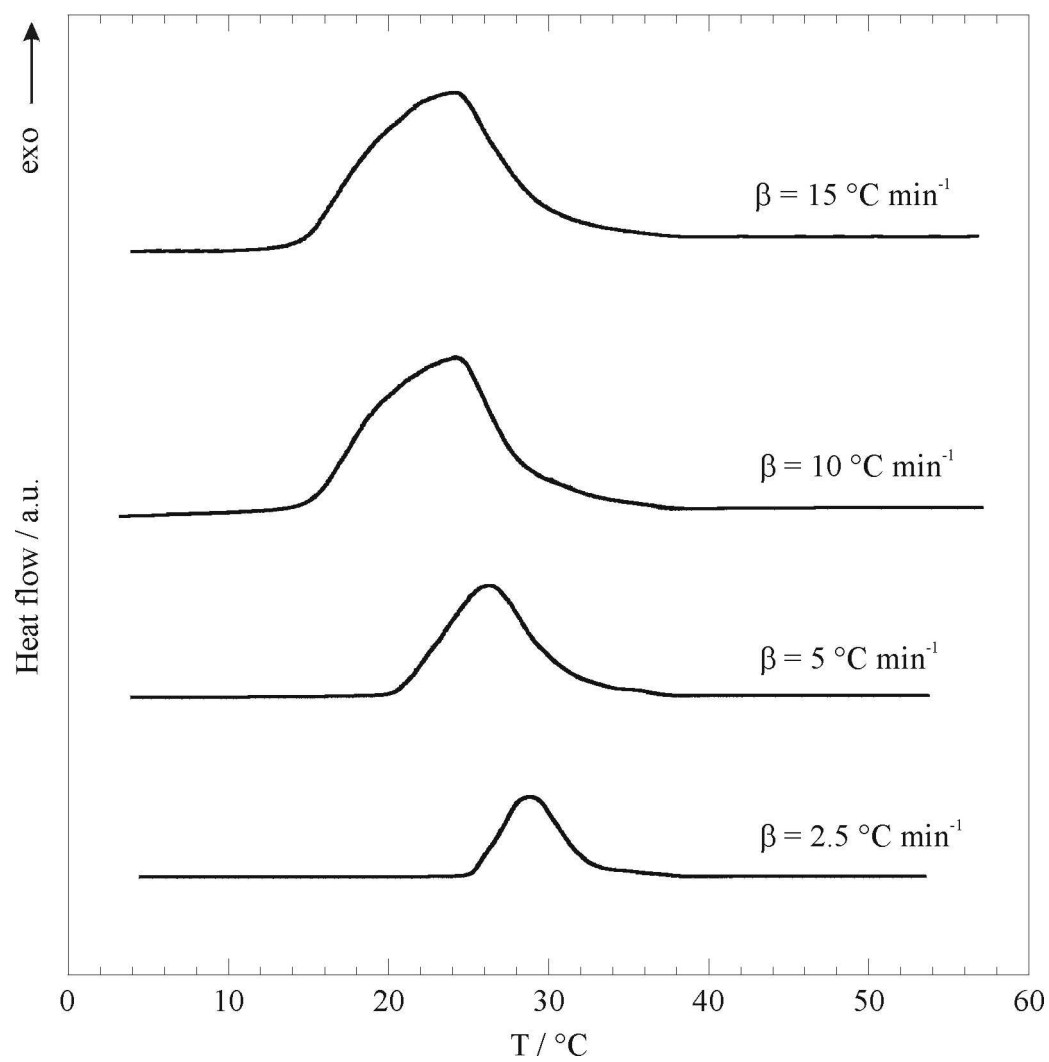

**Figure 5S.** DSC curves of PEG 2000/laponite RD at the cac at various cooling rates.

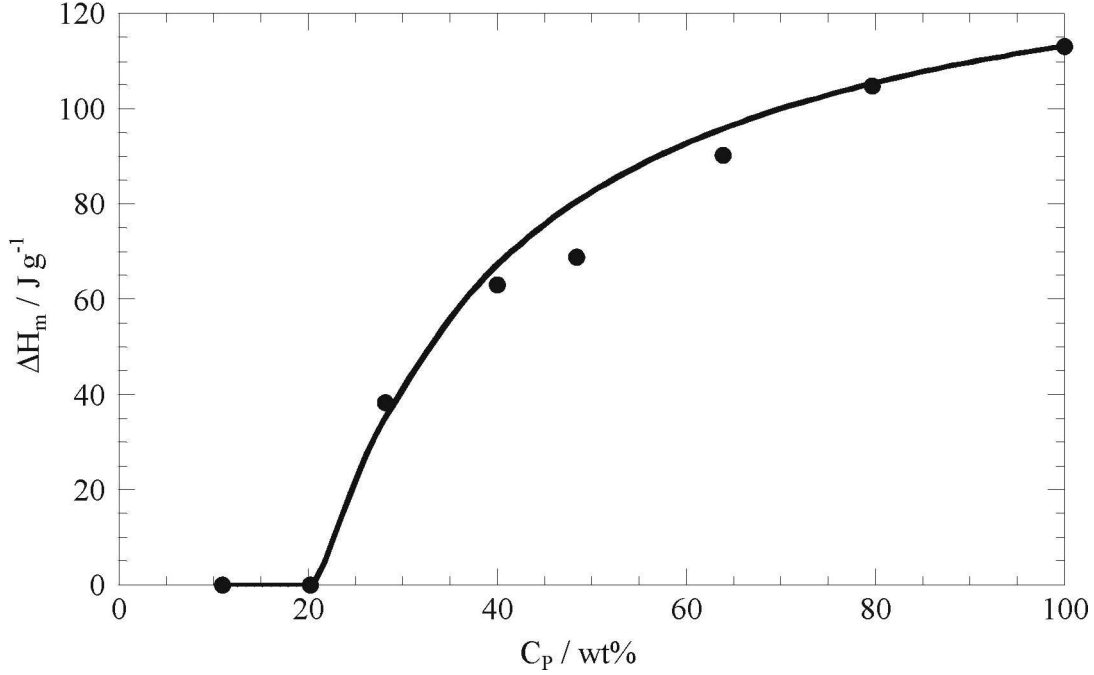

**Figure 6S.** Dependence on the copolymer weight percent of the enthalpy of melting for the F127/laponite RD mixtures. Line is calculated according to Eq. 1 of the MS.

#### Procedure to calculate the cac value

By defining the amount of macromolecule which can be associated to 1 gram of laponite RD ( $\omega$ ) as  $\text{cac}/(100-\text{cac})$ , Eq. 2b of the MS can be rewritten as

$$x_f = 1 + \omega - \frac{100 \omega}{C_P} \quad \text{for } C_P > \text{cac} \quad (1s)$$

By introducing Eq. 1s into Eq. 1 of the MS the latter predicts a linear decrease of  $\Delta H_m$  with  $1/C_P$  provided by the melting of the free copolymer. The intersection of such a straight-line with the abscissa axis gives the cac value. Using the cac and  $\Delta H_m^*$  values,  $\Delta H_m$  was calculated by means of Eq. 1 of the MS and fitted very well the experimental points (Figure 6s).
